# Supplementary material for: Development of the Japanese Core Outcome Measures Index (COMI): cross-cultural adaptation and psychometric validation
Source: Springer Nature journal article supplement (doi:10.1186/s12891-018-1986-x), 2018-03-02
Supplement: MOESM1 [file 15503984]

腰や背中<sup>の</sup>の不調で治療を受けている方は、**A**の質問にすべてお答えください（黄色用紙）。

頸<sup>くび</sup>の不調で治療を受けている方は、**B**の質問にすべてお答えください（青色用紙）。

**A** 腰や背中<sup>の</sup>の不調は、腰や背中<sup>の</sup>の痛み、かつ/または脚<sup>あし</sup>/でん部（おしり）の痛み、または、ピリピリ感、チクチク感、しびれ、といった感覚の障害につながることがあります。

1 以下のうち**最も**困るのはどの不調ですか。1つだけ選んでチェック（✓）をつけてください。

- <sub>1</sub> 腰や背中<sup>の</sup>の痛み
- <sub>2</sub> 脚<sup>あし</sup>/でん部（おしり）の痛み
- <sub>3</sub> 腰や背中<sup>の</sup>、脚<sup>あし</sup>、でん部（おしり）の感覚の障害（例、ピリピリ感、チクチク感、しびれなど）
- <sub>4</sub> 上記に該当なし

2 以下の2問（2aと2b）について、あなたの痛みの強さを回答してください。

回答は、0から10までの線上に×印をつけてください。

0は痛みなし、10はあなたの想像できる最もひどい痛みです。

質問は、腰や背中<sup>の</sup>の痛みと、脚<sup>あし</sup>の痛み（坐骨神経痛）/でん部（おしり）の痛みの2つにわかれています。

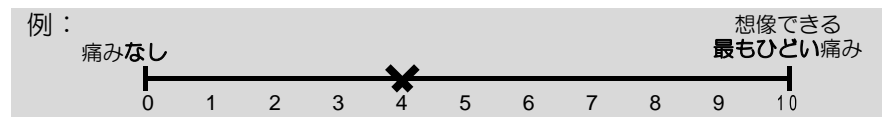

2a 先週、腰や背中<sup>の</sup>の痛みの強さはどの程度でしたか。

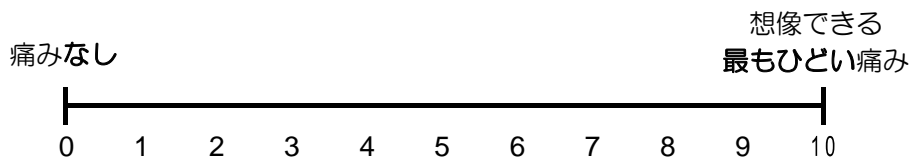

2b 先週、脚<sup>あし</sup>の痛み（坐骨神経痛）/でん部（おしり）の痛みの強さはどの程度でしたか。

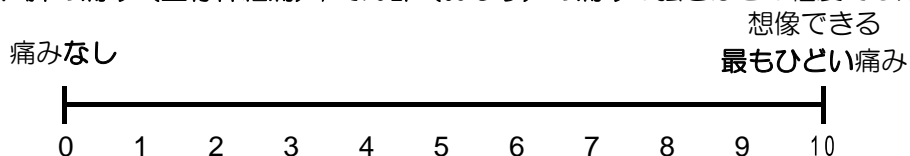

3 ここ1週間、あなたの腰や背中<sup>の</sup>の不調で、普段の仕事（仕事と家事の両者を含む）がどの程度妨げられましたか。

- <sub>1</sub> まったく妨げられなかった
- <sub>2</sub> わずかに妨げられた
- <sub>3</sub> まあまあ妨げられた
- <sub>4</sub> かなり妨げられた
- <sub>5</sub> 非常に妨げられた

4 現在の症状が今後一生続くとしたら、どう感じますか。

- <sub>1</sub> とても満足
- <sub>2</sub> やや満足
- <sub>3</sub> 満足でも不満でもない
- <sub>4</sub> やや不満
- <sub>5</sub> とても不満

A

5 過去7日間を振り返ってください。あなたの生活の質（QOL）を、どのように評価しますか。

- <sub>1</sub> とても良い
- <sub>2</sub> 良い
- <sub>3</sub> 良くも悪くもない
- <sub>4</sub> 悪い
- <sub>5</sub> とても悪い

6 ここ4週間、あなたの腰や背中の不調のために、普段していること（仕事、家事、学業、趣味の活動や娯楽）を何日減らしましたか。

- <sub>1</sub> 減らしていない
- <sub>2</sub> 1～7日
- <sub>3</sub> 8～14日
- <sub>4</sub> 15～21日
- <sub>5</sub> 22日以上

7 ここ4週間、あなたの腰や背中の不調で、仕事（仕事、学校、家事）に行くことができない日がありましたか。

- <sub>1</sub> なかった
- <sub>2</sub> 1～7日
- <sub>3</sub> 8～14日
- <sub>4</sub> 15～21日
- <sub>5</sub> 22日以上

日付： \_\_\_\_\_

署名： \_\_\_\_\_

お答えいただき、心より感謝します

腰や背中<sup>の</sup>の不調は、腰や背中<sup>の</sup>の痛み、かつ/または脚<sup>あし</sup>/でん部（おしり）の痛み、または、ピリピリ感、チクチク感、しびれ、といった感覚の障害につながることがあります。

- 1 以下のうち最も困るのはどの不調ですか。1つだけ選んでチェック（✓）をつけてください。
- <sub>1</sub> 腰や背中<sup>の</sup>の痛み
  - <sub>2</sub> 脚<sup>あし</sup>/でん部（おしり）の痛み
  - <sub>3</sub> 腰や背中<sup>の</sup>、脚<sup>あし</sup>、でん部（おしり）の感覚の障害（例、ピリピリ感、チクチク感、しびれなど）
  - <sub>4</sub> 上記に該当なし

- 2 以下の2問（2aと2b）について、あなたの痛みの強さを回答してください。

回答は、0から10までの線上に×印をつけてください。

0は痛みなし、10はあなたの想像できる最もひどい痛みです。

質問は、腰や背中<sup>の</sup>の痛みと、脚<sup>あし</sup>の痛み（坐骨神経痛）/でん部（おしり）の痛みの2つにわかれています。

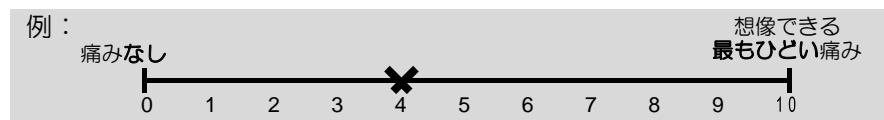

- 2a 先週、腰や背中<sup>の</sup>の痛みの強さはどの程度でしたか。

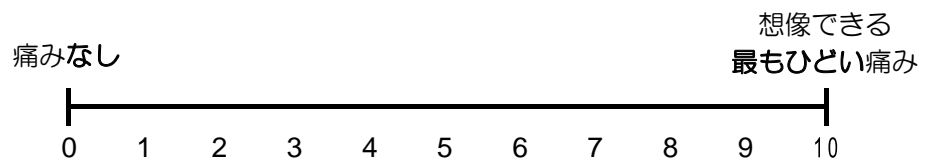

- 2b 先週、脚<sup>あし</sup>の痛み（坐骨神経痛）/でん部（おしり）の痛みの強さはどの程度でしたか。

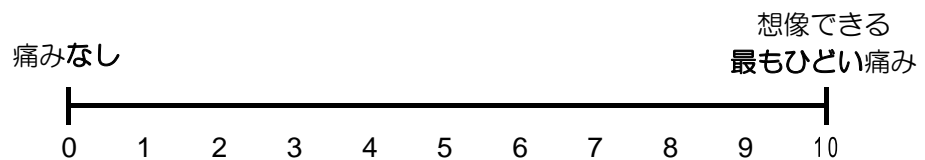

- 3 ここ1週間、あなたの腰や背中<sup>の</sup>の不調で、普段の仕事（仕事と家事の両者を含む）がどの程度妨げられましたか。
- <sub>1</sub> まったく妨げられなかった
  - <sub>2</sub> わずかに妨げられた
  - <sub>3</sub> まあまあ妨げられた
  - <sub>4</sub> かなり妨げられた
  - <sub>5</sub> 非常に妨げられた

- 4 現在の症状が今後一生続いたら、どう感じますか。
- <sub>1</sub> とても満足
  - <sub>2</sub> やや満足
  - <sub>3</sub> 満足でも不満でもない
  - <sub>4</sub> やや不満
  - <sub>5</sub> とても不満

- 5 過去7日間をふり返ってください。あなたの生活の質（QOL）を、どのように評価しますか。
- <sub>1</sub> とても良い
  - <sub>2</sub> 良い
  - <sub>3</sub> 良くも悪くもない
  - <sub>4</sub> 悪い
  - <sub>5</sub> とても悪い

- 6 **ここ4週間**、あなたの腰や背中の不調のために、**普段していること**（仕事、家事、学業、趣味の活動や娯楽）を**何日減らしましたか**。
- <sub>1</sub> 減らしていない  
<sub>2</sub> 1～7日  
<sub>3</sub> 8～14日  
<sub>4</sub> 15～21日  
<sub>5</sub> 22日以上

- 7 **ここ4週間**、あなたの腰や背中の不調で、仕事（仕事、学校、家事）に**行くことができない日**が何日ありましたか。
- <sub>1</sub> なかった  
<sub>2</sub> 1～7日  
<sub>3</sub> 8～14日  
<sub>4</sub> 15～21日  
<sub>5</sub> 22日以上

8a 1年前の手術の結果、何か**合併症**が起きましたか（例、創（きず）の治りの問題、麻痺、感覚の障害）。

<sub>1</sub> いいえ

<sub>2</sub> はい → 合併症を記載してください： \_\_\_\_\_

- 8b 合併症で、どの程度悩まされましたか？
- <sub>1</sub> まったく悩まされていない  
<sub>2</sub> わずかに悩まされた  
<sub>3</sub> まあまあ悩まされた  
<sub>4</sub> かなり悩まされた  
<sub>5</sub> 非常に悩まされた

- 9 1年前の手術から、何らかの**腰椎（腰や背中）の追加手術**を受けましたか。
- <sub>1</sub> いいえ  
<sub>2</sub> はい、しかし**脊椎のレベル（背骨の場所）**が異なります  
<sub>3</sub> はい、同じ**脊椎のレベル（同じ背骨の場所）**です

- 10 あなたの腰や背中の不調に対する**治療を通し、当院での医療（ケア）全般に**、どの程度満足しましたか。
- <sub>1</sub> とても満足  
<sub>2</sub> やや満足  
<sub>3</sub> 満足でも不満でもない  
<sub>4</sub> やや不満  
<sub>5</sub> とても不満

- 11 全体的にみて、**1年前の手術は**、あなたの腰や背中の不調を、どの程度改善しましたか。
- <sub>1</sub> とても改善した  
<sub>2</sub> 改善した  
<sub>3</sub> 少ししか改善しなかった  
<sub>4</sub> 改善しなかった  
<sub>5</sub> 悪化した

日付： \_\_\_\_\_

署名： \_\_\_\_\_
